# Supplementary material for: Composition and Activity of the Non-canonical Gram-positive SecY2 Complex
Source: PubMed Central journal article supplement (PMC5076819; doi:10.1074/jbc.m116.729806), 2016-08-22
Supplement: 10.1074_M116.729806_jbc.M116.729806-1.pdf [file 10.1074_M116.729806_jbc.M116.729806-1.pdf]

## SUPPLEMENTAL DATA

### Composition and activity of the non-canonical Gram-positive SecY2 complex

Mikaila Bandara<sup>1,2,4</sup>, Robin A. Corey<sup>2</sup>, Remy Martin<sup>2</sup>, J. Mark Skehel<sup>3</sup>, Ariel J. Blocker<sup>4,2</sup>,  
Howard F. Jenkinson<sup>1</sup>, and Ian Collinson<sup>2</sup>

<sup>1</sup> School of Oral and Dental Sciences, Lower Maudlin Street, Bristol, BS1 2LY, UK

<sup>2</sup> School of Biochemistry, University of Bristol, University Walk, BS8 1TD, UK

<sup>3</sup> Biological Mass Spectrometry and Proteomics, MRC Laboratory of Molecular Biology, Francis  
Crick Avenue, Cambridge, CB2 0QH, UK

<sup>4</sup> School of Cellular and Molecular Medicine, University of Bristol, University Walk, BS8 1TD, UK

To whom correspondence should be addressed: Ian Collinson, School of Biochemistry, University of  
Bristol, University Walk, Bristol, BS8 1TD, UK; Telephone: +44 (0) 117 342 4358; Email:  
ian.collinson@bristol.ac.uk

Running Title: – *The SecY2-Asp4-Asp5 complex of S. gordonii*

**Keywords:** accessory Sec system, SecY2, *Streptococcus gordonii*, secretion, translocon,  
membrane, complex, transport, ATPase

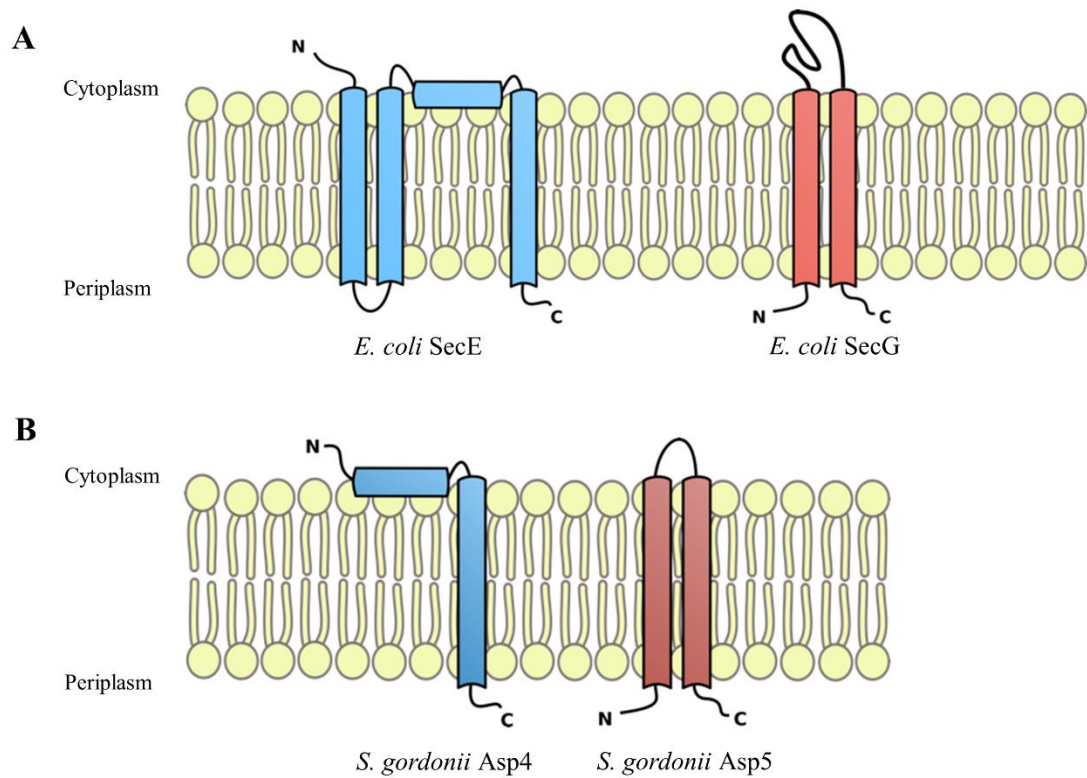

**FIGURE S1. Membrane topology map of *E. coli* SecE & SecG, compared to predicted topology of *S. gordonii* Asp4 & Asp5.** (A) Schematic of *E. coli* SecE and SecG. SecE is shown in blue and SecG in red. (B) Predicted topology of Asp4 and Asp5 from *S. gordonii*. Asp4 is shown in blue, and Asp5 in red.

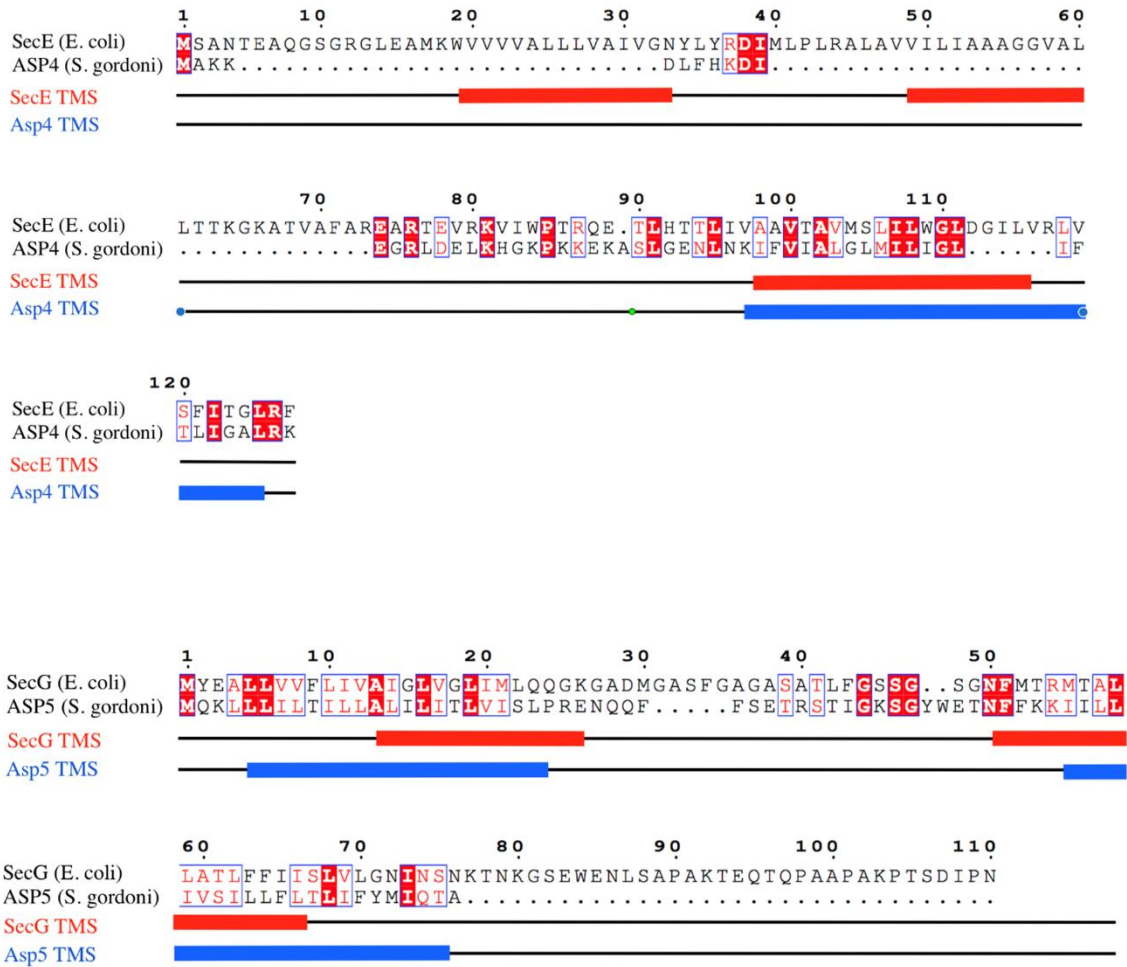

**FIGURE S2. Sequence Alignments of SecE & SecG from *E. coli* to Asp4 & Asp5 from *S. gordonii*.** Known transmembrane segments (TMS) for *E. coli* are shown as a red bar below the sequence. Predicted TMS for Asp4 and Asp5 are shown as blue bars. TMS predictions were carried out using TMPred ([http://www.ch.embnet.org/software/TMPRED\\_form.html](http://www.ch.embnet.org/software/TMPRED_form.html)). The global alignment of sequences was performed using MUSCLE (<http://www.ebi.ac.uk/Tools/msa/muscle/>). Sequence conservation was annotated using ESPript (<http://esprpt.ibcp.fr>). Conserved residues are shown as bold white letters on a red background, whilst similar residues are shown as red letters on a white background.

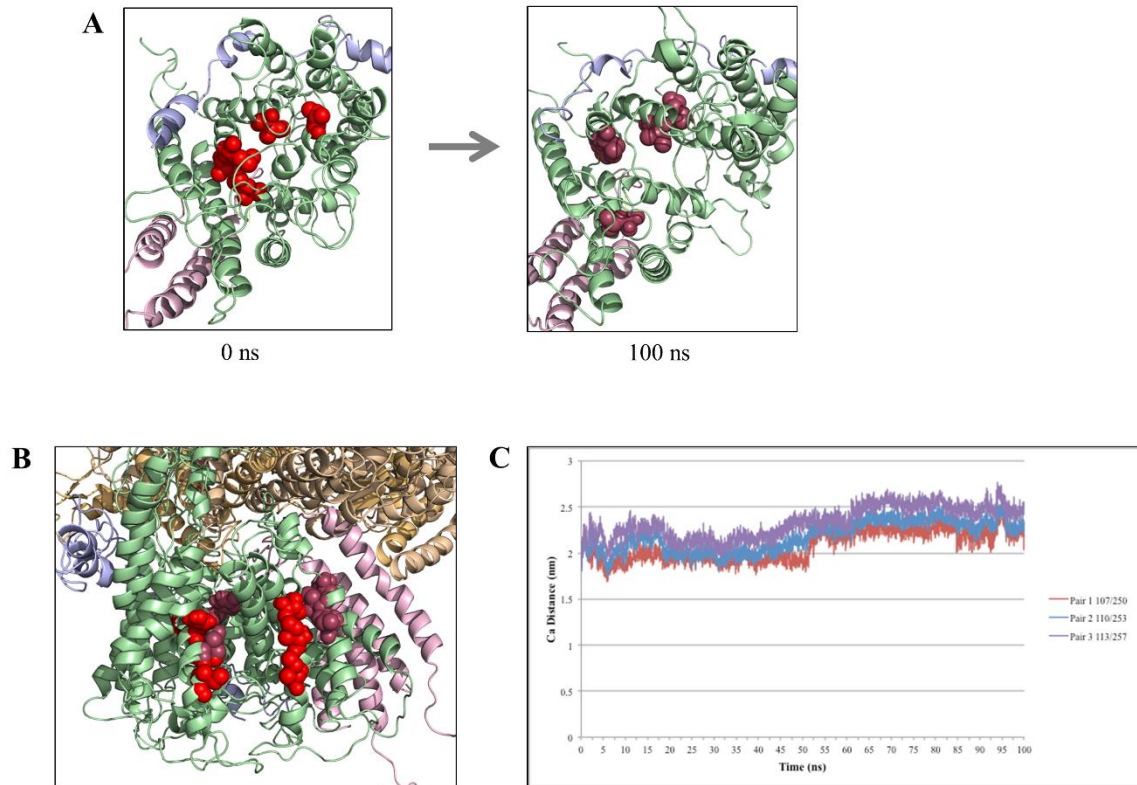

**FIGURE S3. Stability of structural features of SecY2 during molecular dynamics simulations.** (A) Snapshot of SecY2 viewed from the periplasmic side (SecA2 omitted for clarity) showing conserved pore ring residues highlighted in red (pre simulation) and burgundy (100ns post simulation). Pore ring residues remain remarkably stable, with only L70 moving significantly. (B) SecY2-Asp4-Asp5-SecA2 complex viewed from the side with conserved SecY2 lateral gate residues highlighted in red (pre simulation) and burgundy (100ns post simulation). (C) Graph showing the distance between 3 conserved pairs of lateral gate residues (T107/Y250, I110/T253, I113/I257) over the course of 100ns of MD simulations.

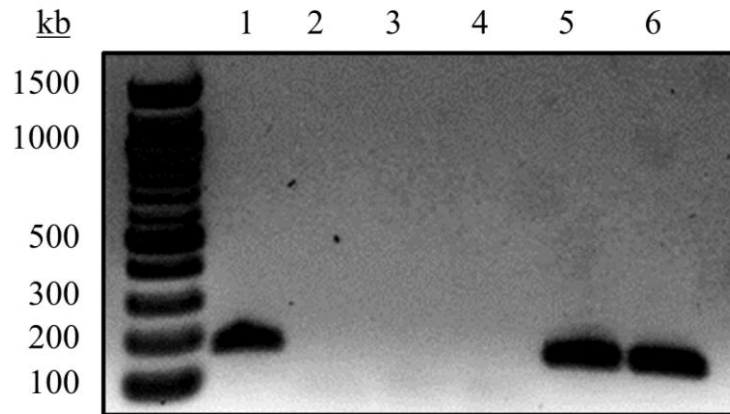

**FIGURE S4. Analysis of *asp5* expression.** RT-PCR (lanes 1-4) was carried out to check expression of *asp5* in the  $\Delta asp4$  mutant. Primers Asp5RT.F and Asp5RT.R amplified a 190 bp product in the *S. gordonii* wild type (lane 1) and no DNA was detected in the  $\Delta asp4$  mutant (lane 2), confirming no expression of *asp5* in  $\Delta asp4$  mutant. As a negative control (no reverse transcriptase), no DNA was detected for both WT and  $\Delta asp4$  mutant (lane 3 & 4, respectively). As a positive control, primers Asp5RT.F and Asp5RT.R amplified 190 bp products in both chromosomal DNA of WT and  $\Delta asp4$  mutant (lane 5 & 6, respectively).

**Table S1. Identification of SecY2 and other proteins by mass spectrometry.** Proteins are sorted from highest to lowest emPAI (exponentially modified protein abundance index). SecY2 (accession: A8AWV0) is highlighted in yellow. Other proteins identified are contaminants mainly from *E. coli*.

| <b>Acc<sup>a</sup></b> | <b>Identified proteins</b>                                                                                                     | <b>MW<sup>b</sup></b> | <b>emPAI<sup>c</sup></b> |
|------------------------|--------------------------------------------------------------------------------------------------------------------------------|-----------------------|--------------------------|
| A1ABW1                 | MltA-interacting protein OS=Escherichia coli O1:K1 / APEC<br>GN=yeaF PE=4 SV=1                                                 | 28                    | 111.57                   |
| B1ES24                 | MltA-interacting protein MipA OS=Escherichia albertii<br>TW07627 GN=mipA PE=4 SV=1                                             | 28                    | 13.715                   |
| C6EGG3                 | 30S ribosomal protein S5 OS=Escherichia coli (strain B /<br>BL21-DE3) GN=rpsE PE=3 SV=1                                        | 18                    | 8.7805                   |
| A1ABQ4                 | Putative uncharacterized protein ydiY OS=Escherichia coli<br>O1:K1 / APEC GN=ydiY PE=4 SV=1                                    | 28                    | 4.5111                   |
| M8RK73                 | ProP effector OS=Escherichia coli 2875000 GN=proQ PE=4<br>SV=1                                                                 | 26                    | 3.2646                   |
| C6EAZ8                 | DnaJ-like protein Dj1A OS=Escherichia coli (strain B / BL21-<br>DE3) GN=dj1A PE=3 SV=1                                         | 31                    | 2.812                    |
| A7ZYQ9                 | Outer membrane protein A OS=Escherichia coli O9:H4 (strain<br>HS) GN=ompA PE=3 SV=1                                            | 37                    | 2.0168                   |
| A7ZHK0                 | Protein AmpE OS=Escherichia coli O139:H28 (strain E24377A<br>/ ETEC) GN=ampE PE=4 SV=1                                         | 32                    | 1.6667                   |
| A1AGP2                 | DNA-binding transcriptional dual regulator OS=Escherichia<br>coli O1:K1 / APEC GN=crp PE=4 SV=1                                | 24                    | 1.5157                   |
| B2NCC4                 | UPF0114 protein YqhA OS=Escherichia coli 53638 GN=yqhA<br>PE=3 SV=1                                                            | 19                    | 1.2871                   |
| B2N9S6                 | 50S ribosomal protein L6 OS=Escherichia coli 53638 GN=rplF<br>PE=3 SV=1                                                        | 19                    | 1.266                    |
| B2N8V8                 | Rhomboid protease GlpG OS=Escherichia coli 53638<br>GN=glpG PE=3 SV=1                                                          | 31                    | 1.2336                   |
| A1AG78                 | Putative export membrane protein OS=Escherichia coli O1:K1 /<br>APEC GN=secG PE=4 SV=1                                         | 11                    | 1.2117                   |
| A7ZJB9                 | Protein TolQ OS=Escherichia coli O139:H28 (strain E24377A /<br>ETEC) GN=tolQ PE=3 SV=1                                         | 26                    | 1.084                    |
| A4W9R6                 | LPP repeat-containing protein (Precursor) OS=Enterobacter sp.<br>(strain 638) GN=Ent638_1767 PE=3 SV=1                         | 8                     | 0.999                    |
| A1A9Z9                 | Penicillin-binding protein activator LpoB OS=Escherichia coli<br>O1:K1 / APEC GN=lpoB PE=3 SV=1                                | 23                    | 0.99404                  |
| A1AA26                 | High frequency lysogenization protein HflD OS=Escherichia<br>coli O1:K1 / APEC GN=yfcC PE=3 SV=1                               | 23                    | 0.96246                  |
| A4WF43                 | 50S ribosomal protein L13 OS=Enterobacter sp. (strain 638)<br>GN=rplM PE=3 SV=1                                                | 19                    | 0.91697                  |
| A7ZJ72                 | Negative modulator of initiation of replication OS=Escherichia<br>coli O139:H28 (strain E24377A / ETEC) GN=seqA PE=3<br>SV=1   | 20                    | 0.84024                  |
| A4MWT3                 | 50S ribosomal protein L5 OS=Haemophilus influenzae 22.1-21<br>GN=rplE PE=3 SV=1                                                | 20                    | 0.84024                  |
| B2N2Y7                 | 4-hydroxybenzoate octaprenyltransferase OS=Escherichia coli<br>53638 GN=ubiA PE=3 SV=1                                         | 33                    | 0.78728                  |
| B1EQM4                 | 50S ribosomal protein L4 OS=Escherichia albertii TW07627<br>GN=rplD PE=3 SV=1                                                  | 22                    | 0.75556                  |
| G5Q8M2                 | 50S ribosomal protein L3 OS=Salmonella enterica subsp.<br>enterica serovar Montevideo str. S5-403 GN=LTSEMON_4733<br>PE=3 SV=1 | 40                    | 0.74847                  |

|        |                                                                                                                                                         |    |         |
|--------|---------------------------------------------------------------------------------------------------------------------------------------------------------|----|---------|
| A8AWV0 | Accessory Sec system protein translocase subunit SecY2<br>OS=Streptococcus gordonii (strain Challis / ATCC 35105 / CH1 / DL1 / V288) GN=secY2 PE=3 SV=1 | 46 | 0.73056 |
| B1ES89 | 50S ribosomal protein L10 OS=Escherichia albertii TW07627<br>GN=rplJ PE=3 SV=1                                                                          | 18 | 0.68724 |
| A7ZK20 | Outer membrane protein F OS=Escherichia coli O139:H28<br>(strain E24377A / ETEC) GN=ompF PE=3 SV=1                                                      | 39 | 0.62075 |
| A7ZN24 | L-arabinose ABC transporter, permease protein<br>OS=Escherichia coli O139:H28 (strain E24377A / ETEC)<br>GN=araH PE=4 SV=1                              | 34 | 0.58558 |
| A1AGJ0 | Protein translocase subunit SecY OS=Escherichia coli O1:K1 /<br>APEC GN=prlA PE=3 SV=1                                                                  | 49 | 0.58143 |
| A1ABX5 | Conserved predicted lipoprotein OS=Escherichia coli O1:K1 /<br>APEC GN=yeaY PE=4 SV=1                                                                   |    | 0.56168 |
| A1AIF4 | Preprotein translocase SecE subunit OS=Escherichia coli<br>O1:K1 / APEC GN=secE PE=4 SV=1                                                               | 14 | 0.55963 |
| A1A7P1 | Lipoprotein OS=Escherichia coli O1:K1 / APEC GN=metQ<br>PE=3 SV=1                                                                                       | 29 | 0.53236 |
| B2NBV2 | Outer-membrane lipoprotein LolB OS=Escherichia coli 53638<br>GN=lolB PE=3 SV=1                                                                          | 24 | 0.48761 |
| A1AHE8 | Predicted rhodanese-related sulfurtransferase OS=Escherichia<br>coli O1:K1 / APEC GN=yibN PE=4 SV=1                                                     | 16 | 0.48209 |
| A1ABI6 | Outer membrane lipoprotein SlyB OS=Escherichia coli O1:K1 /<br>APEC GN=slyB PE=4 SV=1                                                                   | 16 | 0.47818 |
| A3PKY7 | Photosynthetic reaction center, M subunit OS=Rhodobacter<br>sphaeroides (strain ATCC 17029 / ATH 2.4.9)<br>GN=Rsph17029_1899 PE=3 SV=1                  | 35 | 0.44094 |
| A8ACP2 | ATP synthase subunit b OS=Citrobacter koseri (strain ATCC<br>BAA-895 / CDC 4225-83 / SGSC4696) GN=atpF PE=3 SV=1                                        | 17 | 0.42944 |
| B7UFR6 | Undecaprenyl-phosphate 4-deoxy-4-formamido-L-arabinose<br>transferase OS=Escherichia coli O127:H6 (strain E2348/69 /<br>EPEC) GN=arnC PE=3 SV=1         | 36 | 0.41751 |
| A1AG15 | Putative uncharacterized protein OS=Escherichia coli O1:K1 /<br>APEC GN=Ecok1_31110 PE=4 SV=1                                                           | 18 | 0.41727 |
| A1A8G3 | Putative metal resistance protein OS=Escherichia coli O1:K1 /<br>APEC GN=ybbM PE=4 SV=1                                                                 | 29 | 0.38053 |
| B7NQF3 | Glycosyltransferase WbbA OS=Escherichia coli O7:K1 (strain<br>IAI39 / ExPEC) GN=wbbA PE=4 SV=1                                                          | 30 | 0.37567 |
| A1A8Q9 | Rod shape-determining protein RodA OS=Escherichia coli<br>O1:K1 / APEC GN=mrdB PE=4 SV=1                                                                | 40 | 0.36675 |
| A1AA11 | ABC transporter, ATP-binding protein OS=Escherichia coli<br>O1:K1 / APEC GN=ycfV PE=3 SV=1                                                              | 31 | 0.35595 |
| B2N133 | Electron transport complex, RnfABCDGE type, A subunit<br>OS=Escherichia coli 53638 GN=rnfA PE=3 SV=1                                                    | 21 | 0.34605 |
| A1ADR8 | Putative permease of transport system for 3 nucleosides<br>OS=Escherichia coli O1:K1 / APEC GN=nupC PE=4 SV=1                                           | 43 | 0.33921 |
| A7ZIG0 | Protein translocase subunit SecD OS=Escherichia coli<br>O139:H28 (strain E24377A / ETEC) GN=secD PE=3 SV=1                                              | 67 | 0.33317 |
| A1ABT9 | Putative uncharacterized protein ynjF OS=Escherichia coli<br>O1:K1 / APEC GN=ynjF PE=3 SV=1                                                             | 23 | 0.31285 |
| A7ZPG1 | Long-chain fatty acid transport protein OS=Escherichia coli<br>O139:H28 (strain E24377A / ETEC) GN=Ece24377A_2640<br>PE=4 SV=1                          | 49 | 0.2994  |
| A1A9X4 | Flagellar L-ring protein OS=Escherichia coli O1:K1 / APEC<br>GN=flgH PE=3 SV=1                                                                          | 25 | 0.28543 |

|        |                                                                                                            |    |         |
|--------|------------------------------------------------------------------------------------------------------------|----|---------|
| B3X8E3 | Cadmium-translocating P-type ATPase OS=Escherichia coli 101-1 GN=cadA PE=3 SV=1                            | 77 | 0.28419 |
| A7ZI47 | Uncharacterized protein OS=Escherichia coli O139:H28 (strain E24377A / ETEC) GN=EcE24377A_0323 PE=4 SV=1   | 25 | 0.28132 |
| A6BVS9 | 30S ribosomal protein S3 OS=Yersinia pestis CA88-4125 GN=rpsC PE=3 SV=1                                    | 26 | 0.27344 |
| A1AGZ9 | Cell division protein FtsX OS=Escherichia coli O1:K1 / APEC GN=ftsX PE=4 SV=1                              | 40 | 0.2714  |
| A1A767 | Chaperone protein DnaJ OS=Escherichia coli O1:K1 / APEC GN=dnaJ PE=3 SV=1                                  | 42 | 0.25266 |
| B3HBU8 | CDP-diacylglycerol pyrophosphatase OS=Escherichia coli B7A GN=cdh PE=3 SV=1                                | 28 | 0.24692 |
| A1ABK2 | Cyclopropane fatty acyl phospholipid synthase OS=Escherichia coli O1:K1 / APEC GN=cfa PE=4 SV=1            | 44 | 0.24221 |
| B1EIL2 | Membrane protein insertase YidC OS=Escherichia albertii TW07627 GN=yidC PE=3 SV=1                          | 62 | 0.23047 |
| A1AEY3 | Putative serine transporter OS=Escherichia coli O1:K1 / APEC GN=sdaC PE=4 SV=1                             | 47 | 0.22541 |
| A0PFL0 | Beta-lactamase OS=Acinetobacter baylyi GN=bla PE=4 SV=1                                                    | 32 | 0.22083 |
| B3XKQ1 | Protease HtpX OS=Escherichia coli 101-1 GN=htpX PE=3 SV=1                                                  | 32 | 0.21754 |
| A1AIA8 | Essential cell division protein OS=Escherichia coli O1:K1 / APEC GN=ftsN PE=4 SV=1                         | 36 | 0.19311 |
| A1A879 | Protein-export membrane protein SecF OS=Escherichia coli O1:K1 / APEC GN=secF PE=3 SV=1                    | 37 | 0.18693 |
| B2NCZ7 | Phospho-N-acetylmuramoyl-pentapeptide-transferase OS=Escherichia coli 53638 GN=mraY PE=3 SV=1              | 40 | 0.17207 |
| F6W7V0 | Uncharacterized protein OS=Equus caballus GN=KRT5 PE=3 SV=1                                                | 62 | 0.16575 |
| A8AKU8 | Elongation factor Tu OS=Citrobacter koseri (strain ATCC BAA-895 / CDC 4225-83 / SGSC4696) GN=tuf PE=3 SV=1 | 43 | 0.1581  |
| B1EIV9 | Serine hydroxymethyltransferase OS=Escherichia albertii TW07627 GN=glyA PE=3 SV=1                          | 45 | 0.15036 |
| A7ZSW8 | Gluconate transporter GntU OS=Escherichia coli O139:H28 (strain E24377A / ETEC) GN=gntU PE=4 SV=1          | 46 | 0.14659 |
| A1A8A0 | Cytochrome o ubiquinol oxidase subunit I OS=Escherichia coli O1:K1 / APEC GN=cyoB PE=3 SV=1                | 74 | 0.13762 |
| A1AHV2 | Transcription termination factor Rho OS=Escherichia coli O1:K1 / APEC GN=rho PE=3 SV=1                     | 50 | 0.13664 |

<sup>a</sup> Protein accession number

<sup>b</sup> Molecular weight (kDa)

<sup>c</sup> Normalized exponentially modified protein abundance index (emPAI)



**Table S2. Identification of Asp4, Asp5, and other proteins by mass spectrometry.** Proteins are sorted from highest to lowest emPAI (exponentially modified protein abundance index). Asp4 (accession: A8AWV6), Asp (accession: A8AWV7) are highlighted in yellow. SecY2 was also identified (highlighted in yellow), which is most likely a break down product. Other proteins identified are contaminants mainly from *E. coli*.

| Acc <sup>a</sup> | Identified proteins                                                                                                               | MW <sup>b</sup> | emPAI <sup>c</sup> |
|------------------|-----------------------------------------------------------------------------------------------------------------------------------|-----------------|--------------------|
| A1ABI6           | Outer membrane lipoprotein SlyB OS=Escherichia coli O1:K1 / APEC GN=slyB PE=4 SV=1                                                | 16              | 9.0862             |
| A1A877           | Putative uncharacterized protein yajC OS=Escherichia coli O1:K1 / APEC GN=yajC PE=4 SV=1                                          | 12              | 7.3213             |
| B3X7S8           | Putative uncharacterized protein OS=Escherichia coli 101-1 GN=EC1011_4794 PE=4 SV=1                                               | 17              | 3.7381             |
| A8AWV6           | Putative uncharacterized protein OS=Streptococcus gordonii (strain Challis / ATCC 35105 / CH1 / DL1 / V288) GN=SGO_0977 PE=4 SV=1 | 7               | 3.7162             |
| B1EQN9           | 50S ribosomal protein L18 OS=Escherichia albertii TW07627 GN=rplR PE=3 SV=1                                                       | 13              | 2.3656             |
| B1EKA6           | Probable Sec-independent protein translocase protein TatE OS=Escherichia albertii TW07627 GN=tatE PE=3 SV=1                       | 7               | 1.8646             |
| A1AHE8           | Predicted rhodanese-related sulfurtransferase OS=Escherichia coli O1:K1 / APEC GN=yibN PE=4 SV=1                                  | 16              | 1.7949             |
| B3APG9           | 30S ribosomal protein S10 OS=Escherichia coli O157:H7 str. EC4486 GN=rpsJ PE=3 SV=1                                               | 12              | 1.7266             |
| B1EQM8           | 50S ribosomal protein L22 OS=Escherichia albertii TW07627 GN=rplV PE=3 SV=1                                                       | 12              | 1.644              |
| B2NCC4           | UPF0114 protein YqhA OS=Escherichia coli 53638 GN=yqhA PE=3 SV=1                                                                  | 19              | 1.4075             |
| A7ZRY7           | Uncharacterized protein OS=Escherichia coli O139:H28 (strain E24377A / ETEC) GN=EcE24377A_3571 PE=4 SV=1                          | 11              | 1.0714             |
| A1AG78           | Putative export membrane protein OS=Escherichia coli O1:K1 / APEC GN=secG PE=4 SV=1                                               | 11              | 1.0463             |
| B2N0S4           | Cell division protein FtsB OS=Escherichia coli 53638 GN=ftsB PE=3 SV=1                                                            | 12              | 1.0108             |
| A1ABS0           | Osmotically inducible lipoprotein E OS=Escherichia coli O1:K1 / APEC GN=osmE PE=4 SV=1                                            | 12              | 0.97766            |
| A7ZSI7           | 30S ribosomal protein S13 OS=Escherichia coli O139:H28 (strain E24377A / ETEC) GN=rpsM PE=3 SV=1                                  | 13              | 0.88103            |
| A1AIF4           | Preprotein translocase SecE subunit OS=Escherichia coli O1:K1 / APEC GN=secE PE=4 SV=1                                            | 14              | 0.83946            |
| A1A7C8           | Cell division protein FtsL OS=Escherichia coli O1:K1 / APEC GN=ftsL PE=3 SV=1                                                     | 14              | 0.83946            |
| B1EQN7           | 30S ribosomal protein S8 OS=Escherichia albertii TW07627 GN=rpsH PE=3 SV=1                                                        | 14              | 0.80889            |
| B2N9U1           | Large-conductance mechanosensitive channel OS=Escherichia coli 53638 GN=mscL PE=3 SV=1                                            | 15              | 0.75391            |
| B1EQP2           | 50S ribosomal protein L15 OS=Escherichia albertii TW07627 GN=rplO PE=3 SV=1                                                       | 15              | 0.75391            |
| A7ZV45           | Uncharacterized protein OS=Escherichia coli O139:H28 (strain E24377A / ETEC) GN=EcE24377A_4735 PE=4 SV=1                          | 7               | 0.73417            |
| B1EQP0           | 30S ribosomal protein S5 OS=Escherichia albertii TW07627 GN=rpsE PE=3 SV=1                                                        | 18              | 0.63038            |

|        |                                                                                                                                                 |    |         |
|--------|-------------------------------------------------------------------------------------------------------------------------------------------------|----|---------|
| A8AWV7 | Putative uncharacterized protein OS= <i>Streptococcus gordonii</i><br>(strain Challis / ATCC 35105 / CH1 / DL1 / V288)<br>GN=SGO_0978 PE=4 SV=1 | 8  | 0.62081 |
| H6P243 | UPF0114 protein YqhA OS= <i>Salmonella enterica</i> subsp. <i>enterica</i><br>serovar Typhi str. P-stx-12 GN=yqhA PE=3 SV=1                     | 19 | 0.59232 |
| L7ZKJ3 | UPF0114 protein yqhA OS= <i>Serratia marcescens</i> WW4<br>GN=yqhA PE=3 SV=1                                                                    | 19 | 0.59232 |
| A1AH39 | Outer membrane protein induced after carbon starvation<br>OS= <i>Escherichia coli</i> O1:K1 / APEC GN=slp PE=4 SV=1                             | 22 | 0.48479 |
| A1A8Y5 | Putative uncharacterized protein OS= <i>Escherichia coli</i> O1:K1 /<br>APEC GN=Ecok1_06310 PE=4 SV=1                                           | 11 | 0.47393 |
| A1AEE0 | 30S ribosomal protein S16 OS= <i>Escherichia coli</i> O1:K1 / APEC<br>GN=rpsP PE=3 SV=1                                                         | 11 | 0.4497  |
| A7ZS71 | Preprotein translocase, SecG subunit OS= <i>Escherichia coli</i><br>O139:H28 (strain E24377A / ETEC) GN=secG PE=4 SV=1                          | 11 | 0.4497  |
| E0R702 | Preprotein translocase subunit SecG OS= <i>Escherichia coli</i><br>NC101 GN=secG PE=4 SV=1                                                      | 11 | 0.4497  |
| B1EFK1 | 50S ribosomal protein L21 OS= <i>Escherichia albertii</i> TW07627<br>GN=rplU PE=3 SV=1                                                          | 12 | 0.44515 |
| B2N1N3 | 50S ribosomal protein L19 OS= <i>Escherichia coli</i> 53638 GN=rplS<br>PE=3 SV=1                                                                | 13 | 0.38986 |
| B2N210 | Fumarate reductase subunit D OS= <i>Escherichia coli</i> 53638<br>GN=frdD PE=3 SV=1                                                             | 13 | 0.38986 |
| A7ZUR4 | Diacylglycerol kinase OS= <i>Escherichia coli</i> O139:H28 (strain<br>E24377A / ETEC) GN=dgkA PE=4 SV=1                                         | 13 | 0.38643 |
| A1ABI8 | Putative uncharacterized protein ydhJ OS= <i>Escherichia coli</i><br>O1:K1 / APEC GN=ydhJ PE=4 SV=1                                             | 27 | 0.385   |
| B2N9S1 | 50S ribosomal protein L14 OS= <i>Escherichia coli</i> 53638<br>GN=rplN PE=3 SV=1                                                                | 14 | 0.37649 |
| A7MJC3 | 30S ribosomal protein S9 OS= <i>Cronobacter sakazakii</i> (strain<br>ATCC BAA-894) GN=rpsI PE=3 SV=1                                            | 15 | 0.33612 |
| B2VEN6 | Outer membrane lipoprotein OS= <i>Erwinia tasmaniensis</i> (strain<br>DSM 17950 / Et1/99) GN=slyB PE=4 SV=1                                     | 15 | 0.32857 |
| C6DIA4 | Rhodanese domain protein OS= <i>Pectobacterium carotovorum</i><br>subsp. <i>carotovorum</i> (strain PC1) GN=PC1_4083 PE=4 SV=1                  | 16 | 0.32372 |
| A6BXN4 | 50S ribosomal protein L13 OS= <i>Yersinia pestis</i> CA88-4125<br>GN=rplM PE=3 SV=1                                                             | 16 | 0.3167  |
| A7ZYG9 | Putative lipoprotein OS= <i>Escherichia coli</i> O9:H4 (strain HS)<br>GN=EcHS_A0969 PE=4 SV=1                                                   | 19 | 0.26501 |
| B1EQN5 | 50S ribosomal protein L5 OS= <i>Escherichia albertii</i> TW07627<br>GN=rplE PE=3 SV=1                                                           | 20 | 0.24707 |
| A1ADR8 | Putative permease of transport system for 3 nucleosides<br>OS= <i>Escherichia coli</i> O1:K1 / APEC GN=nupC PE=4 SV=1                           | 43 | 0.23587 |
| A9MSZ7 | 50S ribosomal protein L4 OS= <i>Salmonella paratyphi</i> B (strain<br>ATCC BAA-1250 / SPB7) GN=rplD PE=3 SV=1                                   | 22 | 0.23141 |
| A7ZJB9 | Protein TolQ OS= <i>Escherichia coli</i> O139:H28 (strain E24377A /<br>ETEC) GN=tolQ PE=3 SV=1                                                  | 26 | 0.19529 |
| D2AXY4 | Uncharacterized protein OS= <i>Streptosporangium roseum</i> (strain<br>ATCC 12428 / DSM 43021 / JCM 3005 / NI 9100)<br>GN=Sros_2172 PE=4 SV=1   | 27 | 0.18695 |
| A1ABW1 | MltA-interacting protein OS= <i>Escherichia coli</i> O1:K1 / APEC<br>GN=yeaF PE=4 SV=1                                                          | 28 | 0.17856 |
| A6FAF7 | ABC transporter, ATP-binding protein OS= <i>Moritella</i> sp. PE36<br>GN=PE36_19220 PE=4 SV=1                                                   | 59 | 0.17263 |

|        |                                                                                                                                                      |     |          |
|--------|------------------------------------------------------------------------------------------------------------------------------------------------------|-----|----------|
| A4CRU4 | UDP-N-acetylglucosamine 2-epimerase OS=Synechococcus sp. (strain WH7805) GN=WH7805_13713 PE=3 SV=1                                                   | 40  | 0.12255  |
| A8AWV0 | Accessory Sec system protein translocase subunit SecY2 OS=Streptococcus gordonii (strain Challis / ATCC 35105 / CH1 / DL1 / V288) GN=secY2 PE=3 SV=1 | 46  | 0.10644  |
| A7ZIG0 | Protein translocase subunit SecD OS=Escherichia coli O139:H28 (strain E24377A / ETEC) GN=secD PE=3 SV=1                                              | 67  | 0.073642 |
| A1A8C9 | Acridine efflux pump OS=Escherichia coli O1:K1 / APEC GN=acrB PE=4 SV=1                                                                              | 114 | 0.043005 |

<sup>a</sup>Protein accession number

<sup>b</sup>Molecular weight (kDa)

<sup>c</sup>Normalized exponentially modified protein abundance index (emPAI)
